# Supplementary material for: Bifurcated binding of the OmpF receptor underpins import of the bacteriocin colicin N into Escherichia coli
Source: PubMed Central journal article supplement (PMC7335789; doi:10.1074/jbc.ra120.013508), 2020-05-12
Supplement: supp_RA120.013508_159578_2_supp_525485_q9x0j0.pdf [file supp_RA120.013508_159578_2_supp_525485_q9x0j0.pdf]

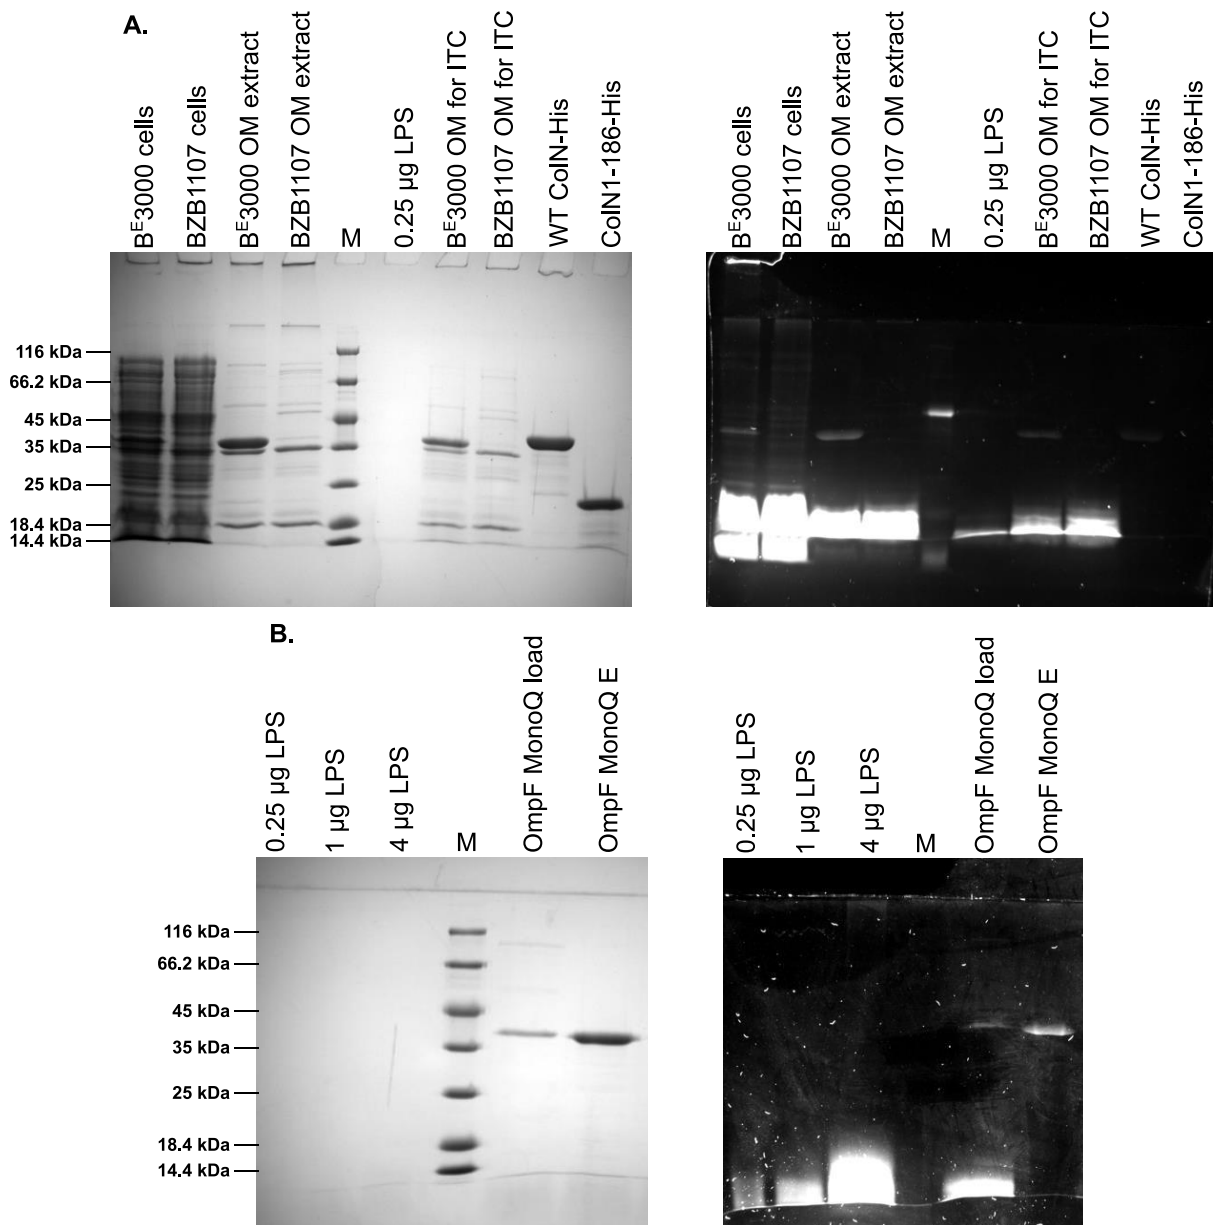

**Supplementary Figure 1.** (A) SDS-PAGE analysis of whole cell lysate, and purified membranes from *E. coli* strains used for ITC experiments in this study. Left: coomassie blue staining, Right: LPS staining. (B) SDS-PAGE analysis of purified OmpF used in this study. Left: coomassie blue staining, Right: LPS staining.

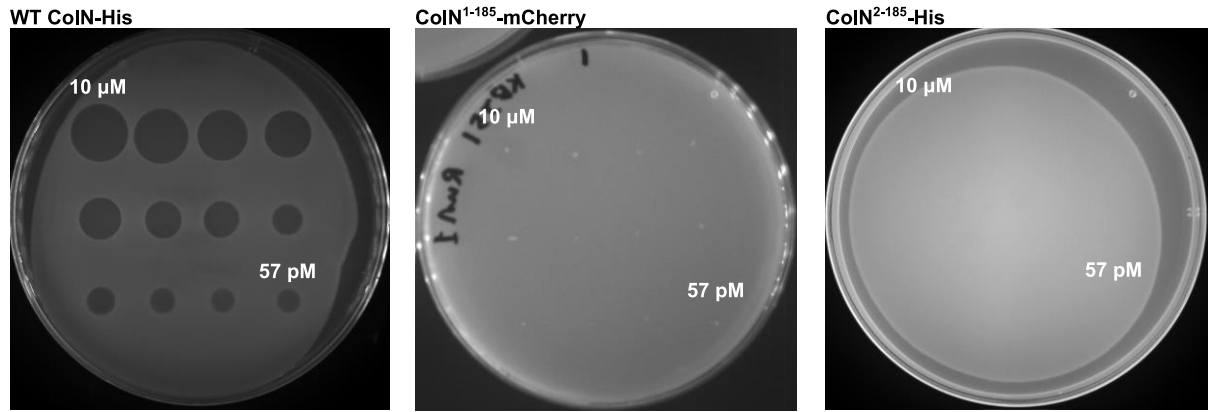

**Supplementary Figure 2.** Colicin N killing assays for three constructs. 3 fold serial dilutions, starting at 10 μM, down to 57 pM of each construct were spotted onto LB-Agar plates containing *E. coli* B<sup>E</sup>3000. WT Colicin N with a C-terminal His-tag displays killing down to 57 pM concentrations. CoIN<sup>1-185</sup>-mCherry and CoIN<sup>2-185</sup>-His both show a lack of any killing activity.
